# Supplementary material
Source: Springer Nature journal article supplement (https://www.springermedizin.de/resource/supplementary/12913_2013_3176_MOESM2_ESM.docx/9532598)
Supplement: MOESM2 [file 9532598]

Box 2: Topic list

| Questions:   - Which elements in daily nursing practice influence patient experiences? - In what way do nurses effect experiences of patients? - What are inhibiting or facilitating factors? |
| --- |
| Topics:   - Clinically competent nurses - Adequate staffing - Nurse-physician relationship - Autonomous nursing practice - Nurse manager support - Control over nursing practice - Support for education - A culture that values concern for patients |
